# Supplementary material
Source: PubMed Central journal article supplement (PMC11000251)
Supplement: NIHMS1979992-supplement-Suppl2.pdf [file NIHMS1979992-supplement-Suppl2.pdf]

**Table S2. Projected Prevalence of CKD in 2020 and 2030 in Adults Aged 30 and Older, by Race**

**a. African-Americans**

| Stage    | Current Prevalence <sup>a</sup> | 2020                   | 2030                   |
|----------|---------------------------------|------------------------|------------------------|
|          | % (95% CI)                      | % (95% CI)             | % (95% CI)             |
| No CKD   | 86.78<br>(86.64–87.92)          | 85.29<br>(85.03–85.62) | 84.97<br>(84.62–85.32) |
| CKD      | 13.22<br>(12.08–14.36)          | 14.71<br>(14.38–14.97) | 15.03<br>(14.68–15.38) |
| Stage 1  | 3.20<br>(2.48–3.91)             | 4.06<br>(3.84–4.24)    | 3.56<br>(3.34–3.76)    |
| Stage 2  | 2.90<br>(2.37–3.43)             | 3.73<br>(3.53–3.94)    | 4.07<br>(3.82–4.34)    |
| Stage 3a | 4.34<br>(3.80–4.89)             | 3.59<br>(3.48–3.72)    | 4.32<br>(4.13–4.49)    |
| Stage 3b | 1.58<br>(1.25–1.90)             | 1.66<br>(1.56–1.76)    | 1.74<br>(1.58–1.88)    |
| Stage 4  | 1.21<br>(0.90–1.51)             | 0.85<br>(0.79–0.93)    | 0.60<br>(0.52–0.70)    |
| Stage 5  | —                               | 0.82<br>(0.71–0.92)    | 0.73<br>(0.62–0.83)    |

**b. Non-African-Americans**

| Stage    | Current Prevalence <sup>a</sup> | 2020                   | 2030                   |
|----------|---------------------------------|------------------------|------------------------|
|          | % (95% CI)                      | % (95% CI)             | % (95% CI)             |
| No CKD   | 86.80<br>(86.18–87.41)          | 85.69<br>(85.52–85.84) | 83.09<br>(82.92–83.30) |
| CKD      | 13.20<br>(12.59–13.82)          | 14.31<br>(14.16–14.48) | 16.91<br>(16.70–17.08) |
| Stage 1  | 1.97<br>(1.74–2.19)             | 2.11<br>(2.04–2.19)    | 1.59<br>(1.51–1.66)    |
| Stage 2  | 3.04<br>(2.78–3.31)             | 3.46<br>(3.34–3.59)    | 4.10<br>(3.96–4.24)    |
| Stage 3a | 5.61<br>(5.18–6.04)             | 6.22<br>(6.13–6.30)    | 8.58<br>(8.44–8.72)    |
| Stage 3b | 1.95<br>(1.74–2.16)             | 1.93<br>(1.86–2.00)    | 2.01<br>(1.94–2.09)    |
| Stage 4  | 0.64<br>(0.53–0.74)             | 0.47<br>(0.43–0.52)    | 0.49<br>(0.44–0.54)    |
| Stage 5  | —                               | 0.13<br>(0.11–0.15)    | 0.14<br>(0.11–0.17)    |
