# Supplementary material
Source: PubMed Central journal article supplement (PMC11000251)
Supplement: NIHMS1979992-supplement-Suppl3.pdf [file NIHMS1979992-supplement-Suppl3.pdf]

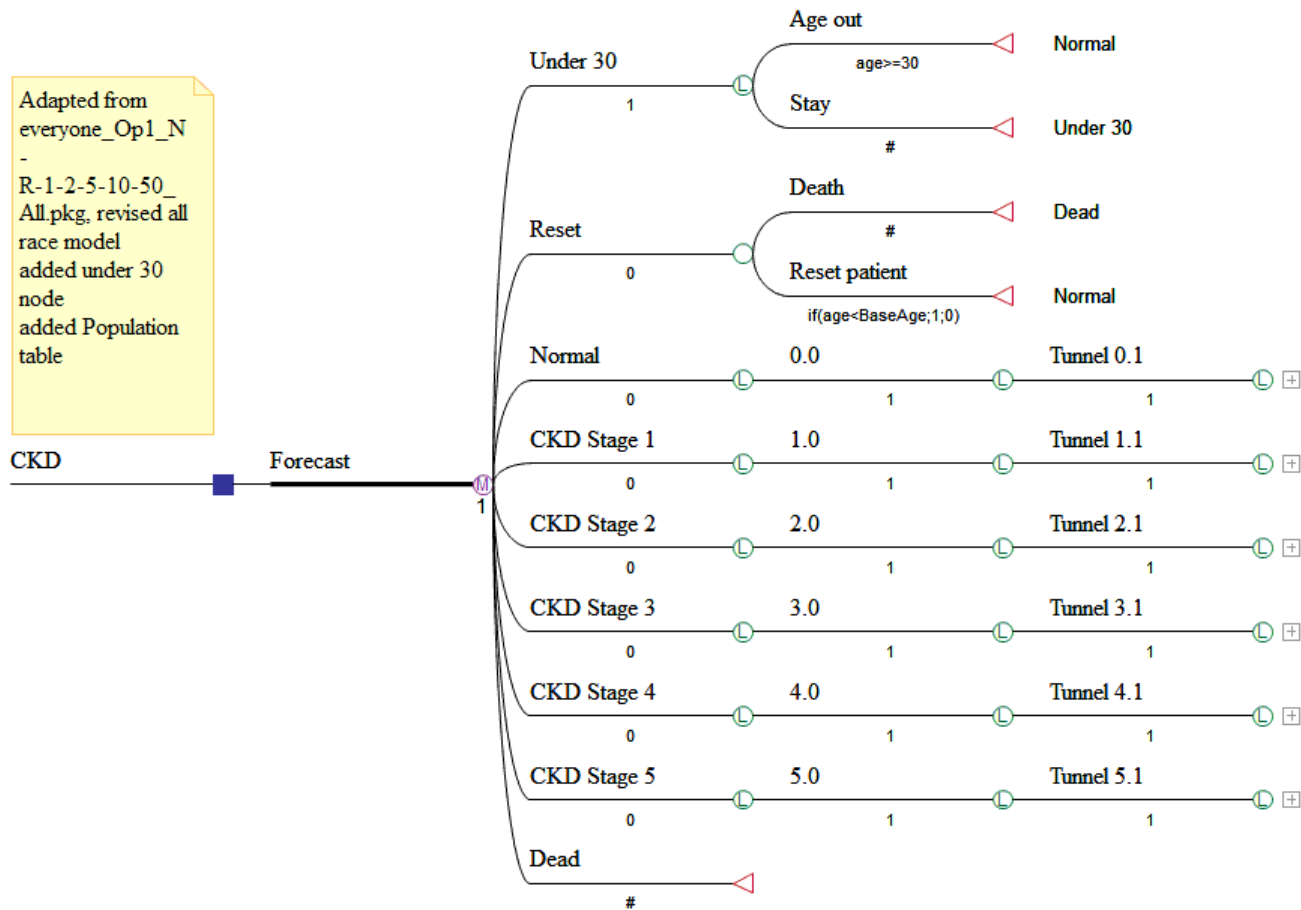

Figure S1: Broad overview of the CKD Health Policy Model . This diagram provides a broad overview of the model as programmed in TreeAge Pro 2014. The key model states are Normal, CKD stages 1-5, and Dead. The Under 30 and Reset states are used to set starting values for the analysis. Circles containing “L” represent logic conditions that determine transition probabilities.
