# Supplementary material
Source: PubMed Central journal article supplement (PMC11000251)
Supplement: NIHMS1979992-supplement-Suppl4.pdf [file NIHMS1979992-supplement-Suppl4.pdf]

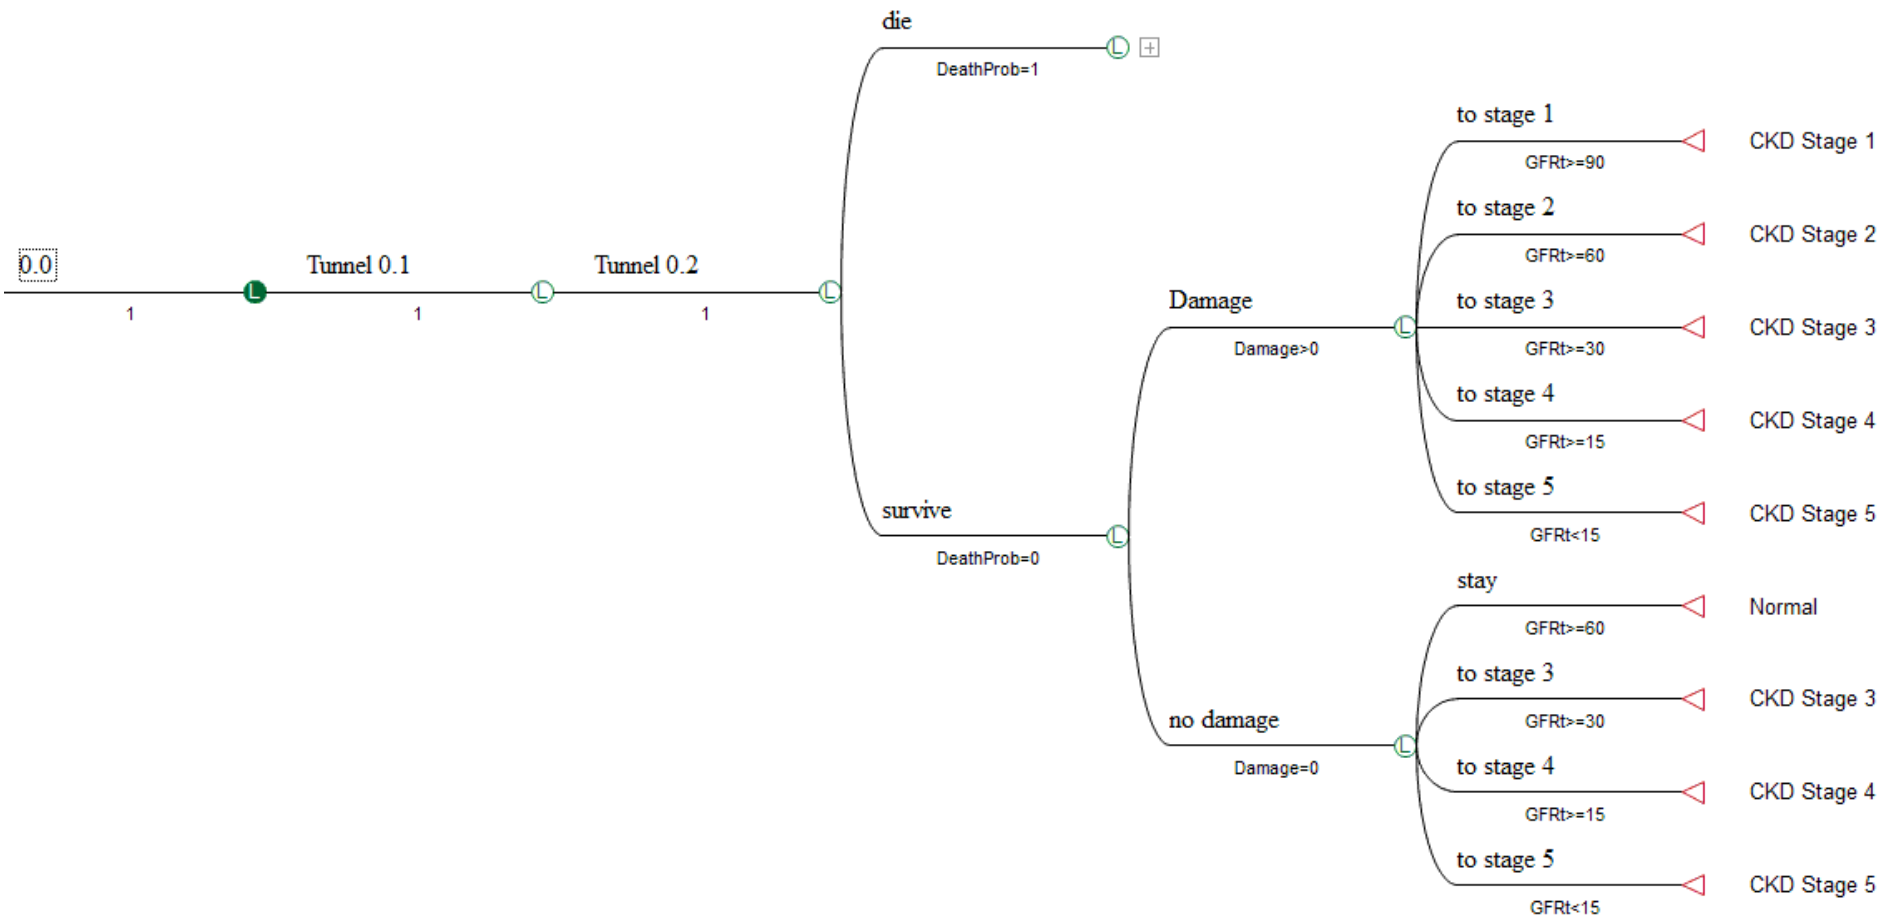

Figure S2. Detailed view of the normal CKD stage subtree. Persons in the Normal CKD state subtree first pass through a series of tunnel states where key model parameters such as age, glomerular filtration rate (GFR), diabetes status, and hypertension status are updated. Individuals may then die or develop albuminuria (Damage). Transitions to CKD stages then depend on damage or GFR. Circles containing “L” represent logic conditions that determine transition probabilities. Subtrees for the other CKD stages have similar structures.
